# Supplementary material for: Sequence heterogeneity of the PenA carbapenemase in clinical isolates of Burkholderia multivorans
Source: PubMed Central journal article supplement (PMC6173980; doi:10.1016/j.diagmicrobio.2018.06.005), 2018-06-18
Supplement: NIHMS981107-supplement-Supplemental.pdf [file NIHMS981107-supplement-Supplemental.pdf]

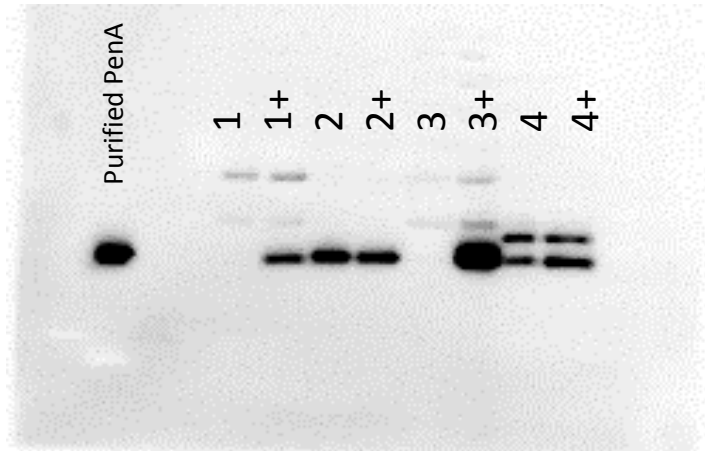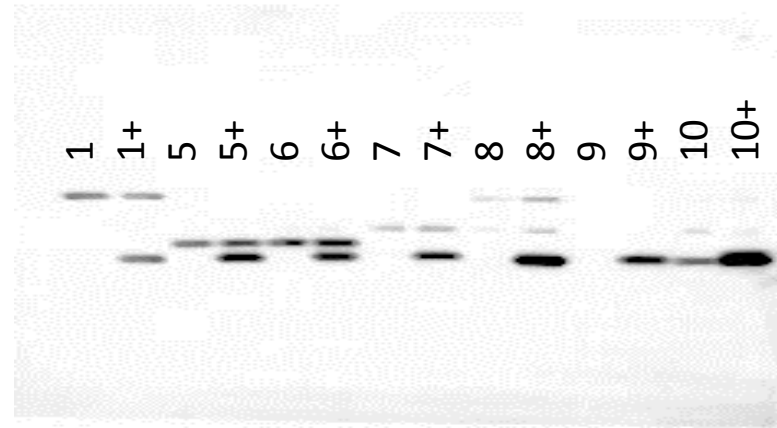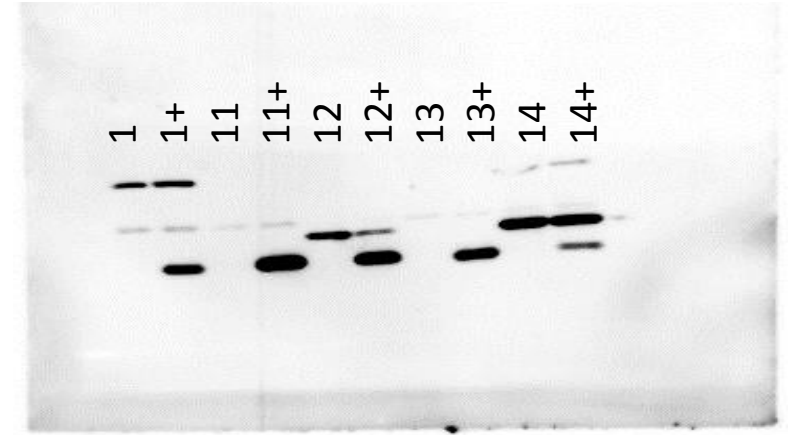

**Key: (+) induced with 1  $\mu$ g/ml imipenem for 2hrs**

- |                     |                   |
|---------------------|-------------------|
| <b>1</b> ATCC 17616 | <b>11</b> AU19158 |
| <b>2</b> AU10398    | <b>12</b> AU21747 |
| <b>3</b> AU14364    | <b>13</b> AU19654 |
| <b>4</b> AU29198    | <b>14</b> AU23690 |
| <b>5</b> AU14786    |                   |
| <b>6</b> AU23919    |                   |
| <b>7</b> AU17545    |                   |
| <b>8</b> AU10086    |                   |
| <b>9</b> AU19729    |                   |
| <b>10</b> AU11233   |                   |

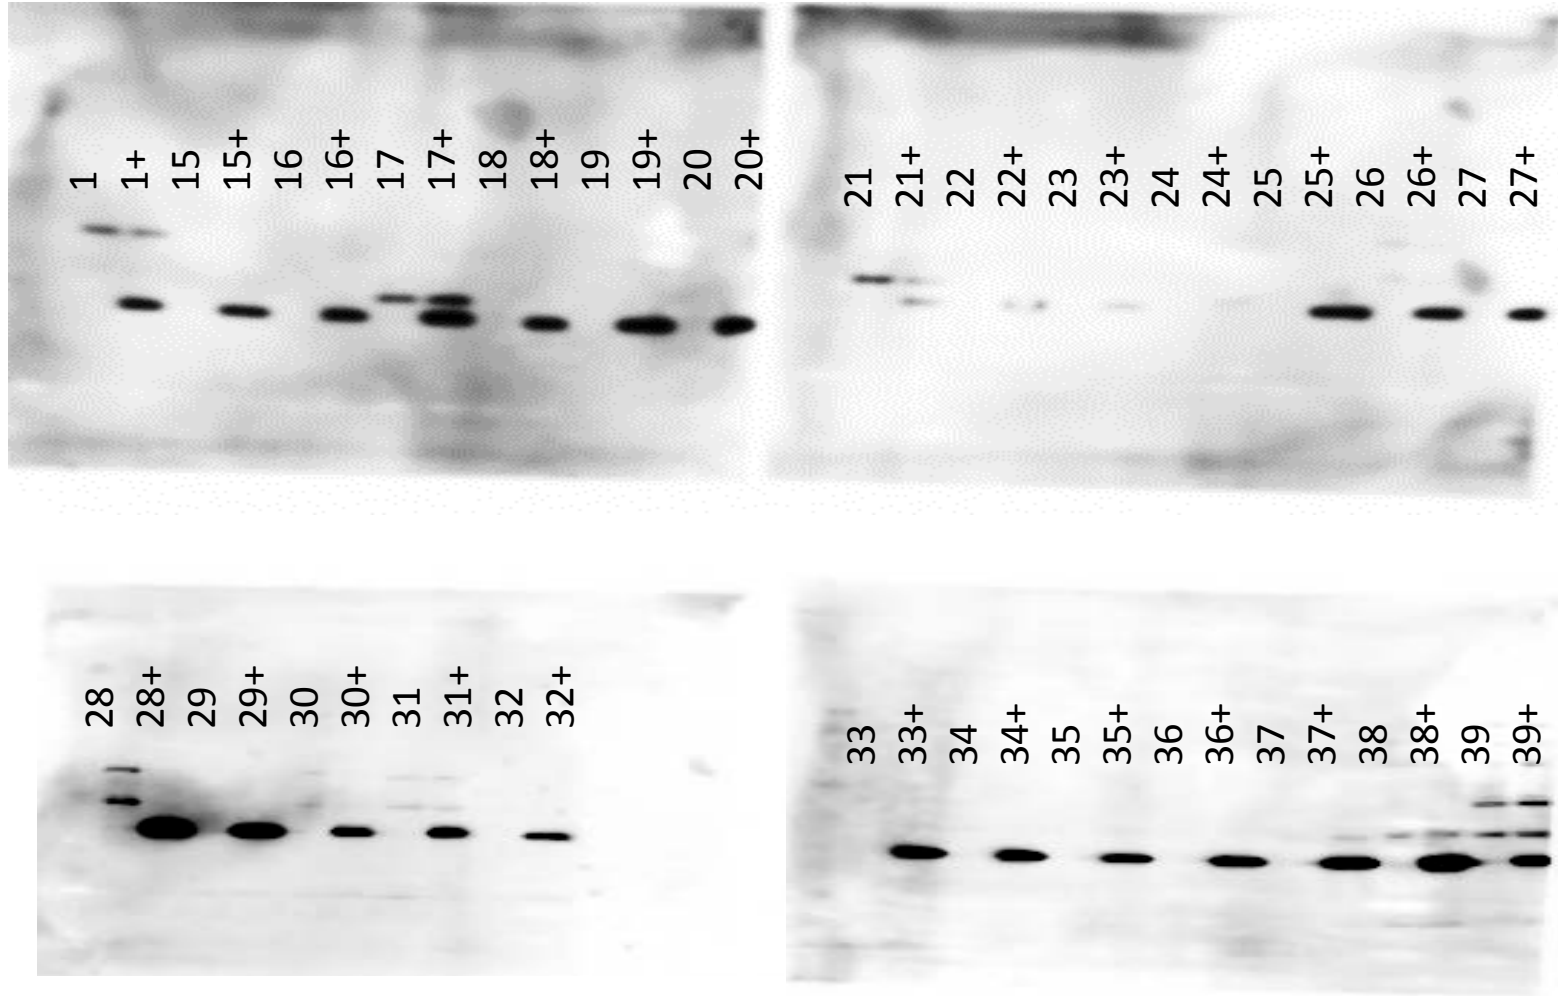

**Key: (+) induced with 1 µg/ml imipenem for 2hrs**

|              |            |            |            |            |
|--------------|------------|------------|------------|------------|
| 1 ATCC 17616 | 21 AU11204 | 26 AU25543 | 31 AU17534 | 36 AU15954 |
| 15 AU21251   | 22 AU12481 | 27 AU28069 | 32 AU17135 | 37 AU20929 |
| 16 AU13919   | 23 AU22892 | 28 AU30441 | 33 AU19564 | 38 AU30760 |
| 17 AU11772   | 24 AU27706 | 29 AU30438 | 34 AU15814 | 39 AU25626 |
| 18 AU14371   | 25 AU30050 | 30 AU11358 | 35 AU23668 |            |
| 19 AU16734   |            |            |            |            |
| 20 AU14328   |            |            |            |            |

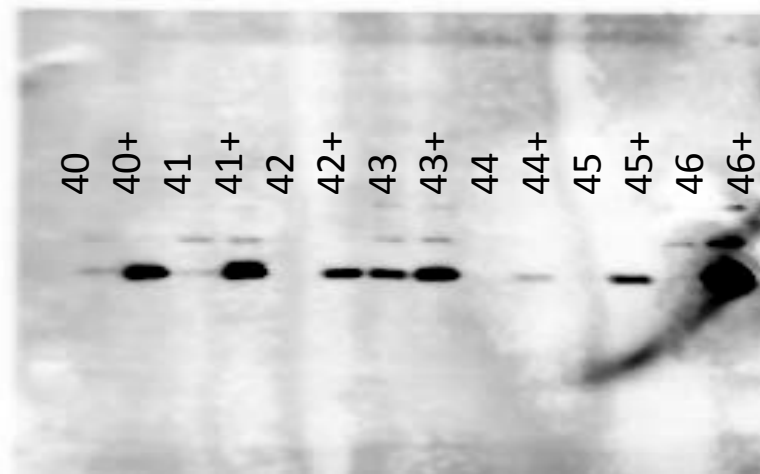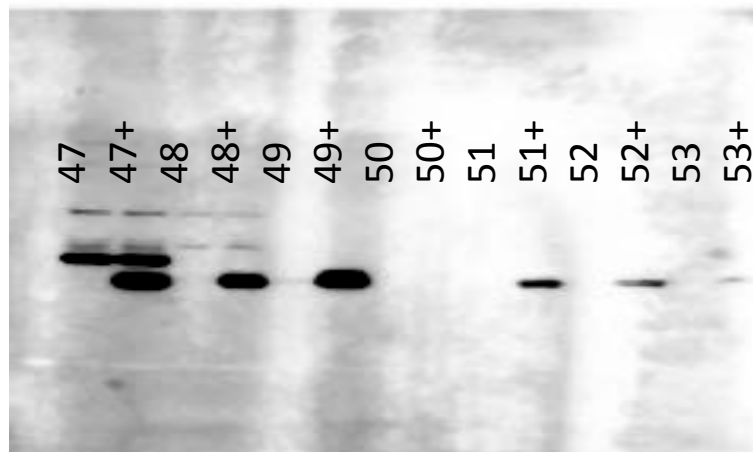

**Key: (+) induced with 1  $\mu$ g/ml imipenem for 2hrs**

**40** AU21015    **51** AU25057

**41** AU21596    **52** AU26250

**42** AU10897    **53** AU18096

**43** AU23995

**44** AU10047

**45** AU4507

**46** AU19659

**47** AU22436

**48** AU23365

**49** AU24277

**50** AU24362 determined to be *B. cenocepacia* (not included in paper)

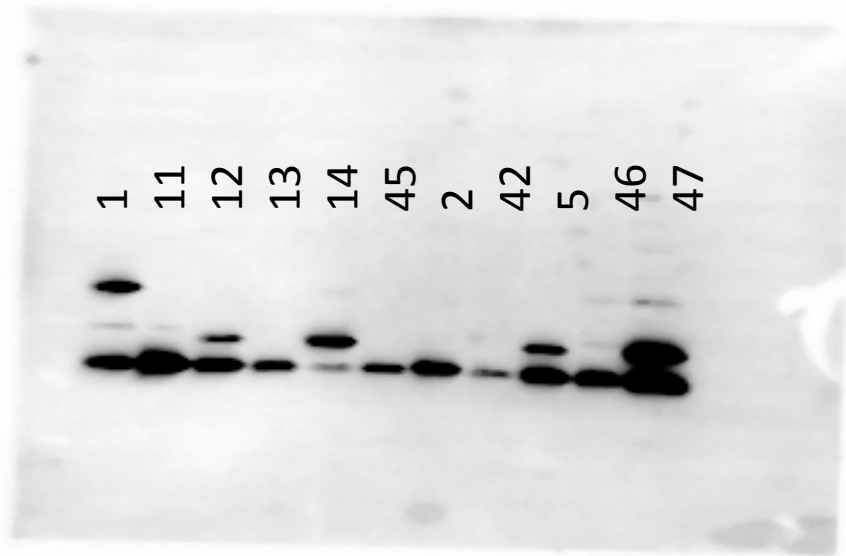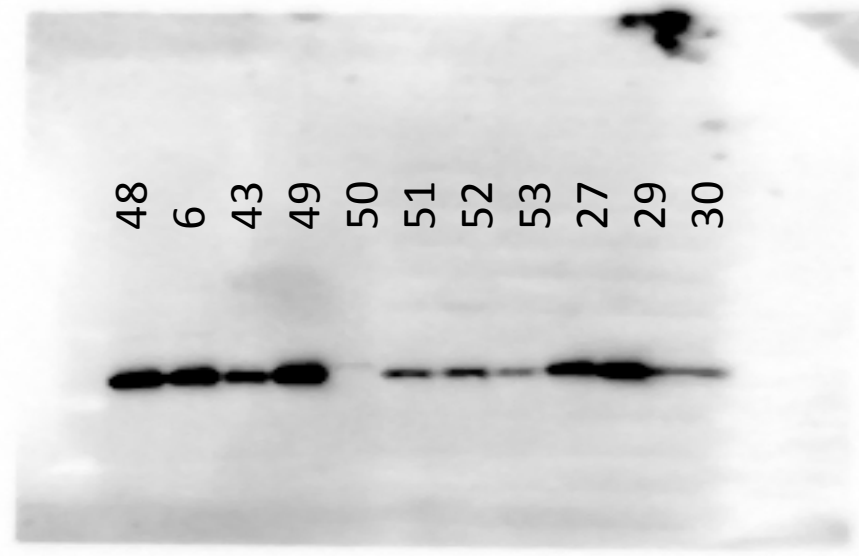

**Key: induced with 1 µg/ml imipenem for 2hrs**

- 1. ATCC 17616
- 11. AU19518
- 12. AU21747
- 13. AU19654
- 14. AU23690
- 45. AU4507
- 2. AU10398
- 42. AU10897

- 5. AU14786
- 46. AU19659
- 47. AU22436
- 48. AU23365
- 6. AU23919
- 43. AU23995
- 49. AU24277

- 51. AU25057
- 52. AU26250
- 53. AU18096
- 27. AU28069
- 29. AU30438
- 30. AU11358

50. AU24362 (*B. cenocepacia*)

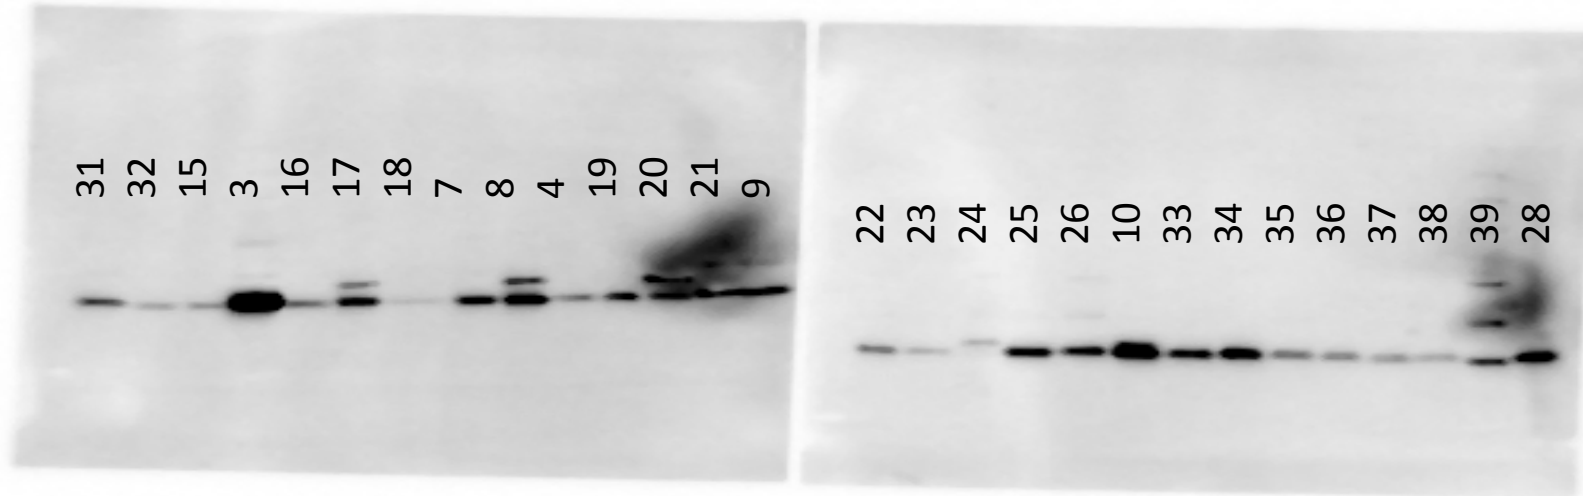

**Key: induced with 1 µg/ml imipenem for 2hrs**

- |             |             |             |             |
|-------------|-------------|-------------|-------------|
| 31. AU17534 | 4. AU29198  | 26. AU25543 | 28. AU30441 |
| 32. AU17135 | 19. AU16734 | 10. AU11233 |             |
| 15. AU21251 | 20. AU14328 | 33. AU19564 |             |
| 3. AU14364  | 21. AU11204 | 34. AU15814 |             |
| 16. AU13919 | 9. AU19729  | 35. AU23668 |             |
| 17. AU11772 | 22. AU12481 | 36. AU15954 |             |
| 18. AU14371 | 23. AU22892 | 37. AU20929 |             |
| 7. AU17545  | 24. AU27706 | 38. AU30760 |             |
| 8. AU10086  | 25. AU30050 | 39. AU25626 |             |

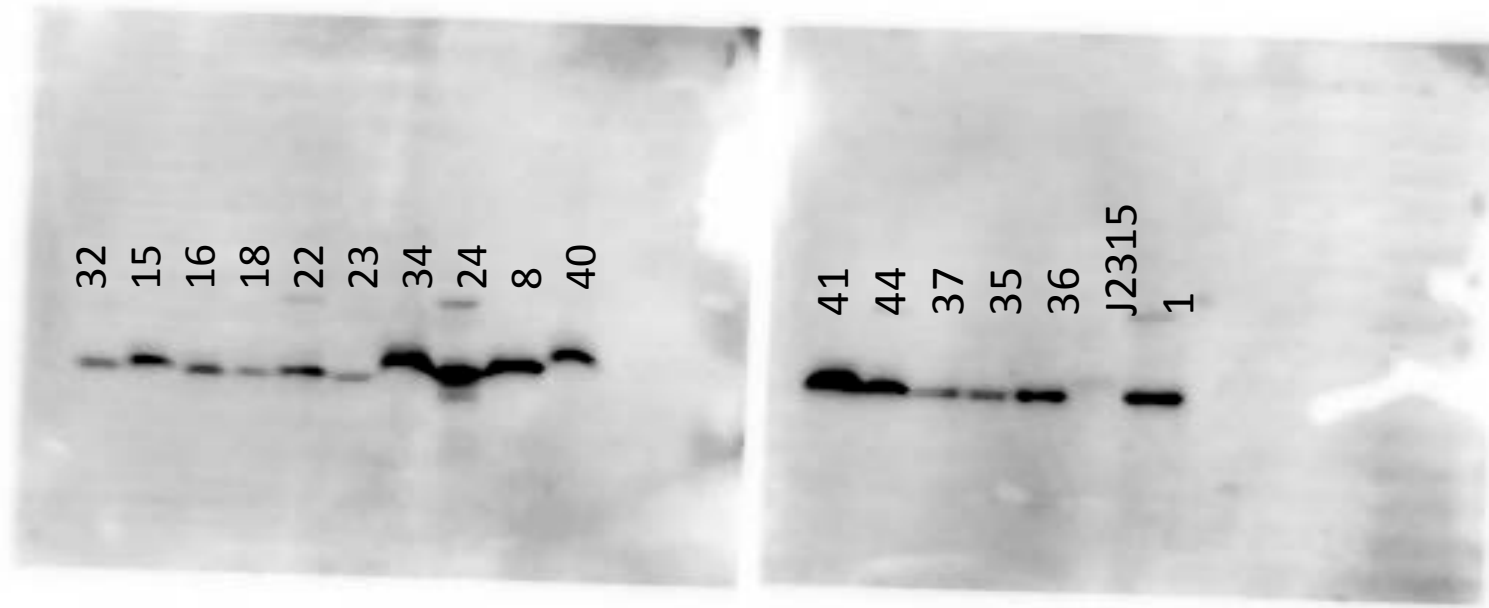

**Key: induced with 1 µg/ml imipenem for 2hrs**

32. AU17135  
15. AU21251  
16. AU13919  
18. AU14371  
22. AU12481  
23. AU22892  
34. AU15814  
24. AU27706

8. AU10086  
40. AU21015  
41. AU21596  
44. AU10047  
37. AU20929  
35. AU23668  
36. AU15954

J2315 (*B. cenocepacia*)  
1. ATCC 17616
